# Supplementary material
Source: Springer Nature journal article supplement (https://www.springermedizin.de/resource/supplementary/13256_2008_506_MOESM2_ESM.pdf/9646130)

Monosomie 7

Sonde: CEP 7 (Fa. Vysis)

**A**

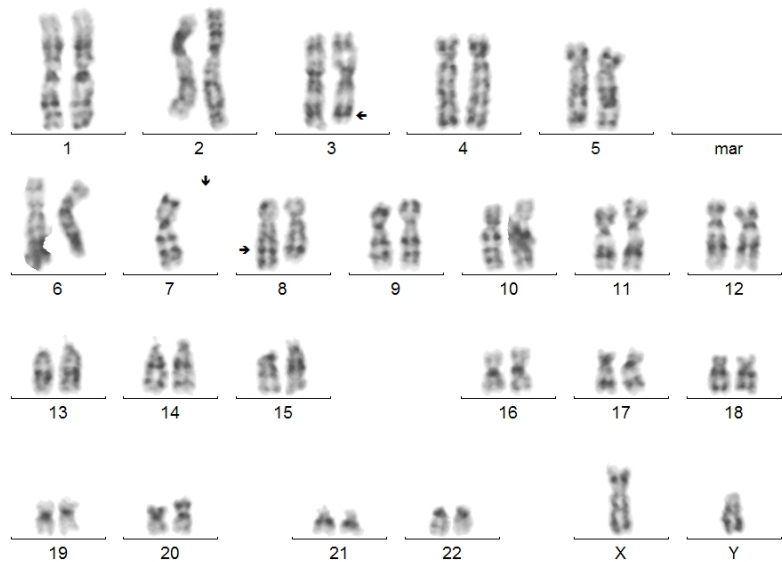

**B**

Supplement: MOESM2 [file 9646130]
